# Supplementary figures and images for: Formulation and Characterisation of Polyester-Lignite Composite Coated Controlled-Release Fertilisers
Source: Research Square preprint supplement (doi:10.21203/rs.3.rs-1352279/v1), 2022-02-16

**Graphical Abstract**


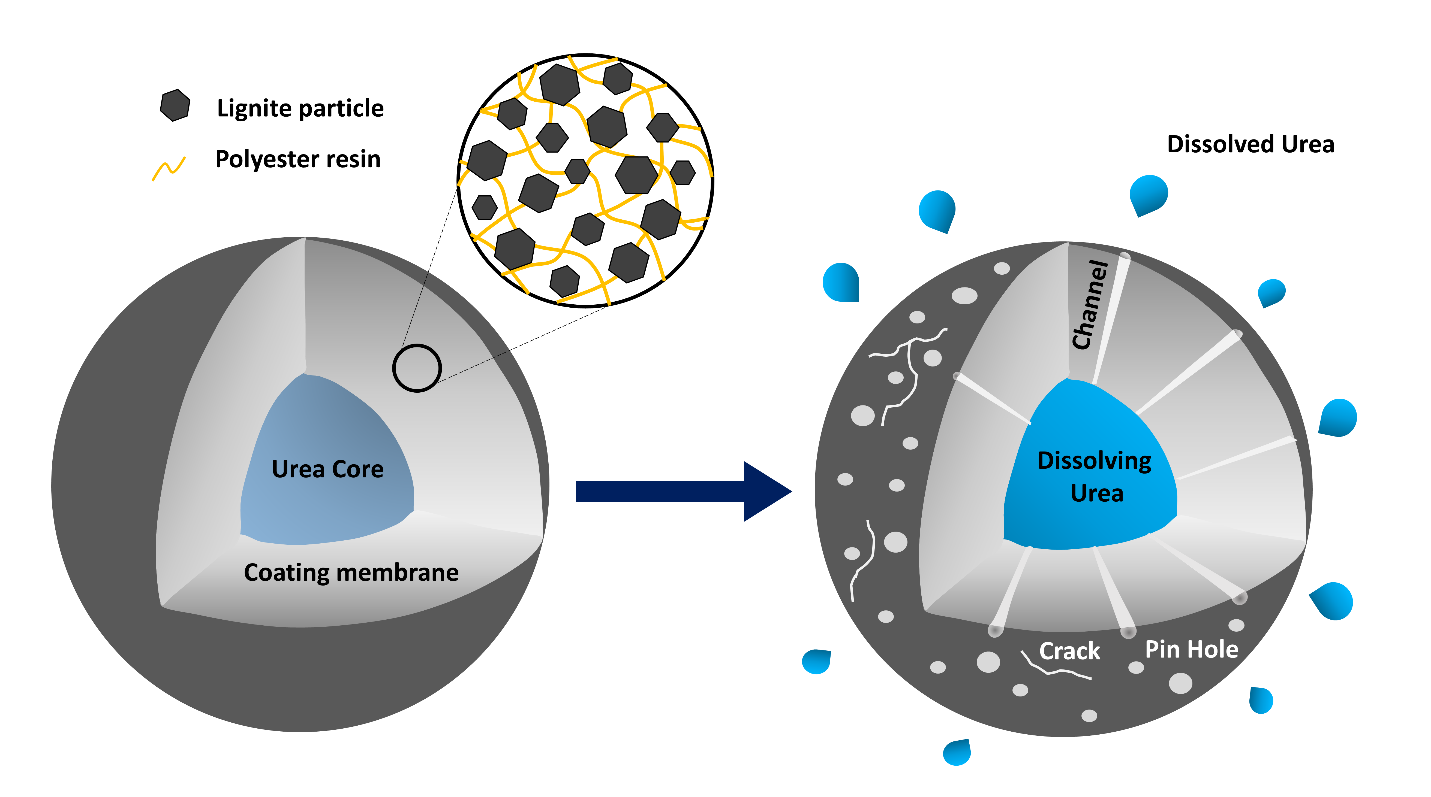

Supplement: Supplementary file 1 [file 96b57b5f548d6e456db197ed.docx]
